# Supplementary material
Source: publisher figshare collection journal article supplement (https://frontiersin.figshare.com/ndownloader/files/25765484)
Supplement: Supplementary file [file 25765484]

## *Supplementary Material*

**Supplementary Table 1.** Operating conditions of ICP-MS (Agilent 7900) for B-As and B-Li determination.

**Supplementary Figure 1.** Scatter plot of the relation between different arsenic exposure biomarkers. Urinary arsenic (U-As) concentrations presented as the sum of iAs metabolites adjusted to average osmolality. The linear regression line (grey) and loess line (red) are indicated.

**Supplementary Table 2.** Summary of Normalized Protein eXpression (NPX) values. Data presented as median and interquartile range (IQR) and ordered by descending number of observations above LOD in the total study group (n=176).

**Supplementary Figure 2.** Heat map of linear models [ $-\log_{10}(p\text{-value})$ ] between the principal components explaining the overall variation of protein levels and different covariates. Only proteins with > 40% of observations above LOD were included, and for those, values below LOD were substituted by the protein specific LOD value since the function cannot handle missing data. Numbers on the X-axis of the heat map represent the principal component and in brackets the percentage of variation explained. Lines in the legend key indicate the unadjusted  $p$ -value threshold (0.05) in blue, and the Bonferroni-adjusted  $p$ -value threshold (0.05/210) in green to account for multiple comparisons. Figure in color available online.

**Supplementary Table 3.** Associations between proteins in urine and B-As.

**Supplementary Figure 3.** Heat map of Spearman correlations between the top proteins associated with B-As ( $p\text{-value} < 0.05$ ). Two asterisks indicate  $p\text{-values} < 0.01$ .

**Supplementary Table 1.** Operating conditions of ICP-MS (Agilent 7900) for B-As and B-Li determination.

| Parameter                               | Setting                                                                                     |
|-----------------------------------------|---------------------------------------------------------------------------------------------|
| Forward plasma power (W)                | 1550                                                                                        |
| Sample depth (mm)                       | 5-9                                                                                         |
| Sampling cone                           | Ni, 1 mm orifice                                                                            |
| Skimmer cone                            | Ni, 0.4 mm orifice                                                                          |
| Spray chamber                           | Double-pass, quartz                                                                         |
| Nebulizer                               | Mira Mist peek                                                                              |
| Torch                                   | Quartz, 2.5 mm id                                                                           |
| Nebulizer gas flow (L/min)              | 0.77-1.00                                                                                   |
| Dilution gas flow (L/min)               | 0.25-0.30                                                                                   |
| Spray chamber cooling temperature (° C) | 2                                                                                           |
| Isotopes monitored                      | <sup>7</sup> Li, <sup>75</sup> As                                                           |
| Cell gas mode                           | <sup>7</sup> Li (no gas), <sup>75</sup> As (He 3.0 mL/min)                                  |
| Internal standards                      | <sup>45</sup> Sc, <sup>72</sup> Ge, <sup>103</sup> Rh, <sup>175</sup> Lu, <sup>193</sup> Ir |
| Replicates                              | 4                                                                                           |
| Sweeps per replicate                    | 100                                                                                         |

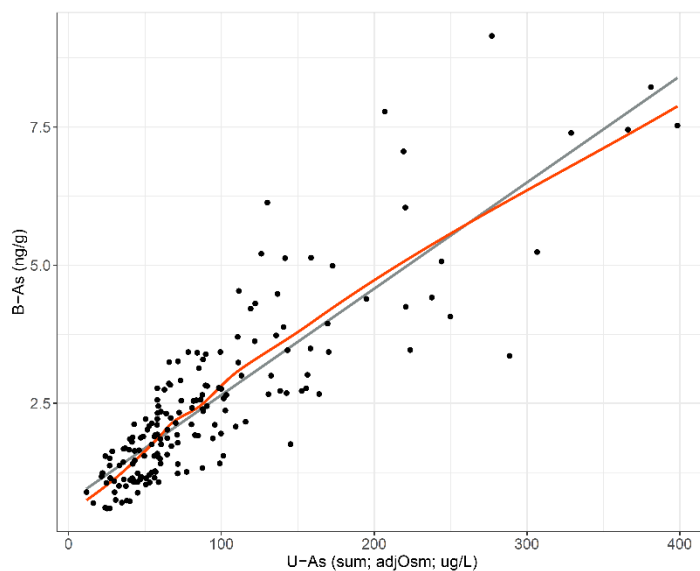

**Supplementary Figure 1.** Scatter plot of the relation between different arsenic exposure biomarkers. Urinary arsenic (U-As) concentrations presented as the sum of iAs metabolites adjusted to average osmolality. The linear regression line (grey) and loess line (red) are indicated.

**Supplementary Table 2.** Summary of Normalized Protein eXpression (NPX) values. Data presented as median and interquartile range (IQR) and ordered by descending number of observations above LOD in the total study group (n=176).

| HGNC symbol                                                                      | Olink symbol | n   | Median (IQR)          |
|----------------------------------------------------------------------------------|--------------|-----|-----------------------|
| Proteins with > 40% of observations above LOD                                    |              |     |                       |
| <b>ADAM8</b>                                                                     | ADAM 8       | 176 | 3.22 (2.37 - 4.04)    |
| <b>ANXA1</b>                                                                     | ANXA1        | 176 | 4.95 (3.51 - 6.25)    |
| <b>CA9</b>                                                                       | CAIX         | 176 | 2.74 (1.99 - 3.26)    |
| <b>CD27</b>                                                                      | CD27         | 176 | 8.83 (7.72 - 9.49)    |
| <b>CRNN</b>                                                                      | CRNN         | 176 | 6.56 (4.58 - 8.64)    |
| <b>EGF</b>                                                                       | EGF          | 176 | 11.78 (11.21 - 11.91) |
| <b>ERBB3</b>                                                                     | ERBB3        | 176 | 2.37 (1.83 - 2.79)    |
| <b>ERBB4</b>                                                                     | ERBB4        | 176 | 5.9 (5.2 - 6.49)      |
| <b>FOLR1</b>                                                                     | FR-alpha     | 176 | 7.11 (5 - 9.36)       |
| <b>HGF</b>                                                                       | HGF          | 176 | 5.73 (5.24 - 6.4)     |
| <b>IFNGR1</b>                                                                    | IFN-gamma-R1 | 176 | 3.19 (2.57 - 4.07)    |
| <b>IGF1R</b>                                                                     | IGF1R        | 176 | 3.13 (2.5 - 3.77)     |
| <b>SDC1</b>                                                                      | SYND1        | 176 | 6.57 (5.27 - 7.37)    |
| <b>TFPI2</b>                                                                     | TFPI-2       | 176 | 4.89 (4.14 - 5.55)    |
| <b>WFDC2</b>                                                                     | WFDC2        | 176 | 9.24 (9.13 - 9.29)    |
| <b>WISP1</b>                                                                     | WISP-1       | 176 | 5.27 (4.66 - 5.92)    |
| <b>CEACAM1</b>                                                                   | CEACAM1      | 174 | 3.32 (2.8 - 4.1)      |
| <b>TNFRSF19</b>                                                                  | TNFRSF19     | 174 | 4.31 (3.4 - 5.16)     |
| <b>ICOSLG</b>                                                                    | ICOSLG       | 173 | 2.71 (1.97 - 3.84)    |
| <b>CD160</b>                                                                     | CD160        | 172 | 3.99 (2.84 - 5.96)    |
| <b>PPY</b>                                                                       | PPY          | 170 | 2.61 (1.84 - 3.5)     |
| <b>VEGFA</b>                                                                     | VEGFA        | 168 | 2.86 (1.79 - 4.88)    |
| <b>LYPD3</b>                                                                     | LYPD3        | 167 | 2.49 (1.14 - 3.86)    |
| <b>ITGB5</b>                                                                     | ITGB5        | 160 | 1.81 (1.51 - 2.2)     |
| <b>TNFSF13</b>                                                                   | TNFSF13      | 160 | 2.5 (1.82 - 3.23)     |
| <b>TGFA</b>                                                                      | TGF-alpha    | 159 | 0.71 (0.23 - 1.49)    |
| <b>LY9</b>                                                                       | LY9          | 151 | 0.7 (0.22 - 1.36)     |
| <b>SPARC</b>                                                                     | SPARC        | 146 | 0.48 (0.25 - 0.73)    |
| <b>FURIN</b>                                                                     | FURIN        | 136 | 1 (0.28 - 1.94)       |
| <b>NECTIN4</b>                                                                   | PVRL4        | 133 | 1.74 (1.08 - 4.05)    |
| <b>TNFRSF4</b>                                                                   | TNFRSF4      | 131 | 2.04 (1.66 - 2.74)    |
| <b>FGFBP1</b>                                                                    | FGF-BP1      | 128 | 1.67 (1.01 - 2.68)    |
| <b>KLK11</b>                                                                     | hK11         | 128 | 0.003 (-1.22 - 1.87)  |
| <b>MSLN</b>                                                                      | MSLN         | 118 | 0.12 (-0.12 - 0.54)   |
| <b>TGFR2</b>                                                                     | TGFR-2       | 105 | 1.08 (0.89 - 1.59)    |
| <b>CD70</b>                                                                      | CD70         | 98  | 1.55 (1.25 - 1.8)     |
| <b>SEZ6L</b>                                                                     | SEZ6L        | 93  | 0.63 (0.5 - 0.87)     |
| <b>KLK13</b>                                                                     | KLK13        | 91  | -0.33 (-1.04 - 1.04)  |
| <b>AREG</b>                                                                      | AREG         | 82  | 0.71 (0.47 - 1.1)     |
| <b>ESM1</b>                                                                      | ESM-1        | 81  | 0.53 (0.35 - 0.79)    |
| <b>KLK8</b>                                                                      | hK8          | 79  | 0.13 (-0.75 - 1.11)   |
| <b>S100A11</b>                                                                   | S100A11      | 76  | 1.71 (1.28 - 2.63)    |
| <b>EPHA2</b>                                                                     | EPHA2        | 75  | 0.65 (0.5 - 1.26)     |
| <b>FASLG</b>                                                                     | FASLG        | 74  | 1.44 (1.22 - 2.09)    |
| <b>CEACAM5</b>                                                                   | CEACAM5      | 73  | 1.43 (1.11 - 2.4)     |
| Proteins with < 40% observations above LOD - Not included in downstream analyses |              |     |                       |
| <b>CXL17</b>                                                                     | CXL17        | 70  | 0.2 (0.14 - 0.28)     |
| <b>GPNMB</b>                                                                     | GPNMB        | 68  | 0.89 (0.75 - 1.3)     |
| <b>TCL1A</b>                                                                     | TCL1A        | 66  | 0.74 (0.44 - 1.21)    |
| <b>METAP2</b>                                                                    | MetAP 2      | 63  | 0.5 (0.31 - 0.96)     |
| <b>DLL1</b>                                                                      | DLL1         | 62  | 1.31 (0.79 - 2.02)    |
| <b>KDR</b>                                                                       | VEGFR-2      | 60  | 1.23 (1.02 - 1.63)    |
| <b>PODXL</b>                                                                     | PODXL        | 59  | 0.96 (0.84 - 1.05)    |
| <b>CXCL13</b>                                                                    | CXCL13       | 57  | 0.94 (0.86 - 1.06)    |
| <b>FOLR3</b>                                                                     | FR-gamma     | 47  | 5.01 (2.74 - 6.99)    |

|                 |               |    |                       |
|-----------------|---------------|----|-----------------------|
| <b>XPNPEP2</b>  | XPNPEP2       | 44 | 1.27 (1.17 - 1.55)    |
| <b>KLK14</b>    | hK14          | 41 | -0.46 (-0.87 - 0.25)  |
| <b>GPC1</b>     | GPC1          | 38 | 0.69 (0.53 - 0.96)    |
| <b>SCAMP3</b>   | SCAMP3        | 35 | 1.71 (1.58 - 2.05)    |
| <b>KITLG</b>    | SCF           | 33 | 0.61 (0.43 - 0.79)    |
| <b>ITGAV</b>    | ITGAV         | 32 | 0.41 (0.38 - 0.47)    |
| <b>TLR3</b>     | TLR3          | 31 | 0.44 (0.22 - 0.84)    |
| <b>ADAMTS15</b> | ADAM-TS 15    | 30 | 0.86 (0.79 - 0.92)    |
| <b>CYR61</b>    | CYR61         | 28 | 0.52 (0.48 - 0.6)     |
| <b>MDK</b>      | MK            | 28 | 0.52 (0.44 - 0.6)     |
| <b>S100A4</b>   | S100A4        | 25 | 1.68 (1.45 - 2.63)    |
| <b>CPE</b>      | CPE           | 23 | 1.27 (0.98 - 1.76)    |
| <b>TNFRSF6B</b> | TNFRSF6B      | 21 | 0.73 (0.7 - 0.78)     |
| <b>ABL1</b>     | ABL1          | 16 | 0.73 (0.6 - 0.92)     |
| <b>CDKN1A</b>   | CDKN1A        | 11 | 0.49 (0.46 - 0.55)    |
| <b>CD207</b>    | CD207         | 9  | 0.11 (0.04 - 0.22)    |
| <b>CD48</b>     | CD48          | 9  | 1.4 (1.32 - 2.35)     |
| <b>MUC16</b>    | MUC-16        | 9  | 1.6 (1.36 - 2.95)     |
| <b>LGALS1</b>   | Gal-1         | 8  | 0.78 (0.63 - 1.46)    |
| <b>MIC-A/B</b>  | MIC-A/B       | 8  | 0.42 (0.4 - 0.51)     |
| <b>CTSV</b>     | CTSV          | 7  | -0.92 (-1.11 - -0.36) |
| <b>FLT4</b>     | VEGFR-3       | 7  | 0.85 (0.83 - 0.88)    |
| <b>IL6</b>      | IL6           | 7  | 1.09 (0.97 - 1.16)    |
| <b>GZMH</b>     | GZMH          | 6  | 0.52 (0.45 - 0.6)     |
| <b>RET</b>      | RET           | 6  | 0.14 (0.12 - 0.16)    |
| <b>TNFSF10</b>  | TRAIL         | 6  | 1.72 (1.63 - 2.12)    |
| <b>RSPO3</b>    | RSPO3         | 4  | 0.58 (0.57 - 0.6)     |
| <b>ERBB2</b>    | ERBB2         | 3  | -0.03 (-0.06 - -0.02) |
| <b>FADD</b>     | FADD          | 3  | 1.03 (1.02 - 1.11)    |
| <b>FCRLB</b>    | FCRLB         | 3  | 0.43 (0.42 - 0.44)    |
| <b>LYN</b>      | LYN           | 3  | 1.16 (0.83 - 1.32)    |
| <b>SMAD5</b>    | MAD homolog 5 | 3  | 0.75 (0.63 - 1.62)    |
| <b>TXLNA</b>    | TXLNA         | 2  | 0.87 (0.87 - 0.88)    |
| <b>WIF1</b>     | WIF-1         | 2  | 0.92 (0.85 - 1)       |
| <b>VIM</b>      | VIM           | 2  | 3.18 (2.64 - 3.72)    |
| <b>MIA</b>      | MIA           | 1  | 0.54 (0.54 - 0.54)    |
| <b>NT5E</b>     | 5-NT          | 1  | 1.19 (1.19 - 1.19)    |
| <b>GZMB</b>     | GZMB          | 0  | NA                    |

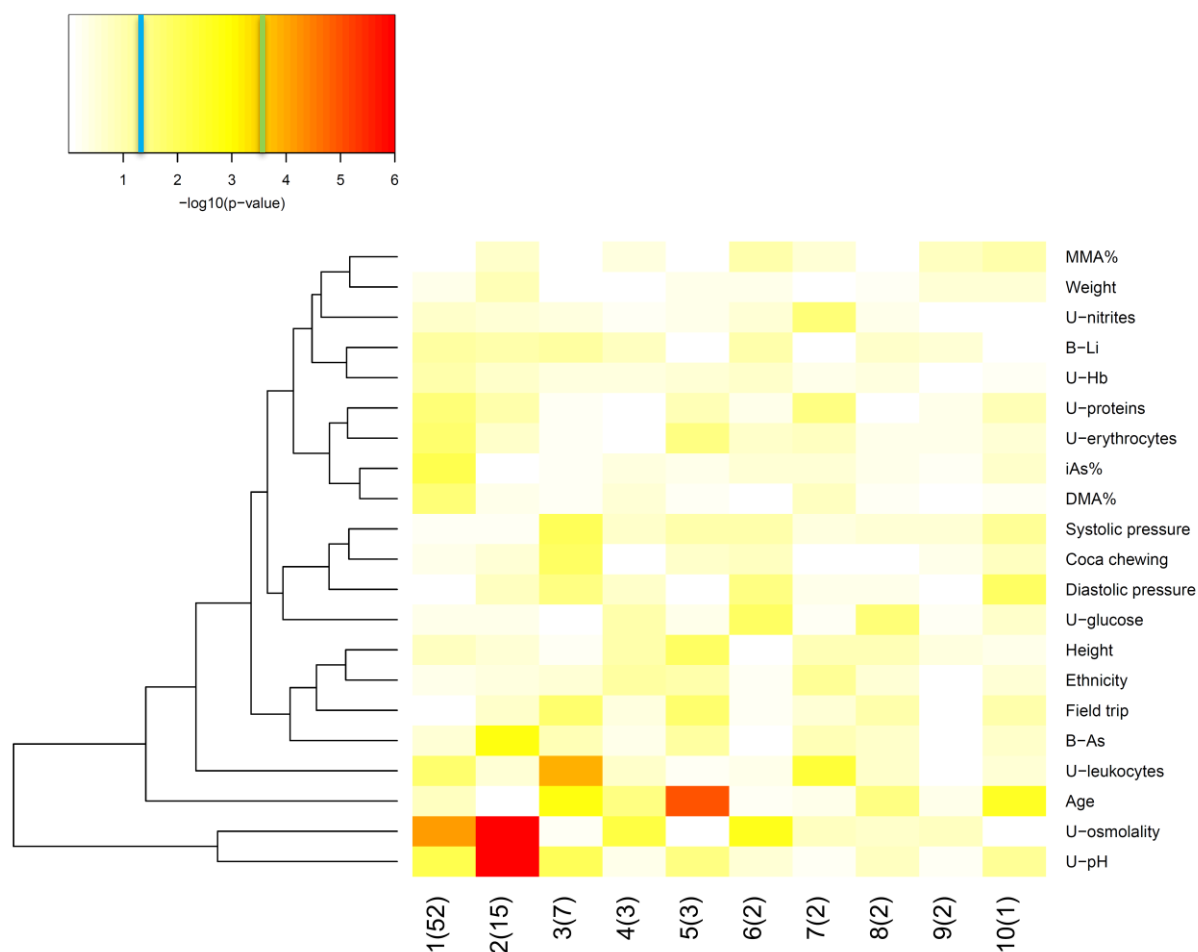

**Supplementary Figure 2.** Heat map of linear models [ $-\log_{10}(p\text{-value})$ ] between the principal components explaining the overall variation of protein levels and different covariates. Only proteins with  $> 40\%$  of observations above LOD were included, and for those, values below LOD were substituted by the protein specific LOD value since the function cannot handle missing data. Numbers on the X-axis of the heat map represent the principal component and in brackets the percentage of variation explained. Lines in the legend key indicate the unadjusted  $p$ -value threshold (0.05) in blue, and the Bonferroni-adjusted  $p$ -value threshold (0.05/210) in green to account for multiple comparisons. Figure in color available online.

Abbreviations and units: Age (years); B-As, whole blood arsenic (ng/g); B-Li, whole blood lithium (ng/g); Coca chewing (yes/no); DMA, dimethylarsinic acid; Ethnicity (Aymara-Quechua or Uru); iAs, inorganic arsenic; MMA, monomethylarsonic acid; Systolic and diastolic blood pressure (mmHg); U-, indicates characteristic measured in urine; U-Hb, urinary hemoglobin; U-osmolality (mOsm/kg); and Weight (kg).

**Supplementary Table 3.** Associations between proteins in urine and B-As.

| Main analysis <sup>a</sup> |     |                    |                         |         | Sensitivity analysis <sup>b</sup> |                    |                        |         |
|----------------------------|-----|--------------------|-------------------------|---------|-----------------------------------|--------------------|------------------------|---------|
| Protein                    | n   | R <sup>2</sup> (%) | B (95% CI)              | p-value | n                                 | R <sup>2</sup> (%) | B (95% CI)             | p-value |
| FASLG                      | 74  | 5                  | 0.155 (0.034, 0.276)    | 0.013   | 68                                | 4                  | 0.165 (-0.001, 0.331)  | 0.052   |
| SEZ6L                      | 93  | 25                 | -0.038 (-0.072, -0.004) | 0.028   | 86                                | 24                 | -0.044 (-0.091, 0.003) | 0.067   |
| LYPD3                      | 166 | 23                 | -0.172 (-0.331, -0.014) | 0.034   | 150                               | 22                 | -0.189 (-0.381, 0.003) | 0.054   |
| TFPI2                      | 175 | 24                 | -0.125 (-0.249, -0.001) | 0.049   | 159                               | 24                 | -0.117 (-0.27, 0.036)  | 0.132   |
| AREG                       | 82  | 15                 | -0.096 (-0.204, 0.012)  | 0.080   | 79                                | 16                 | -0.074 (-0.186, 0.039) | 0.195   |
| CA9                        | 175 | 49                 | -0.05 (-0.112, 0.013)   | 0.119   | 159                               | 48                 | -0.036 (-0.113, 0.04)  | 0.352   |
| ESM1                       | 81  | 7                  | -0.067 (-0.152, 0.019)  | 0.124   | 74                                | 5                  | -0.041 (-0.145, 0.063) | 0.435   |
| ICOSLG                     | 172 | 3                  | -0.097 (-0.225, 0.03)   | 0.134   | 156                               | 3                  | -0.044 (-0.199, 0.111) | 0.576   |
| CD70                       | 98  | 11                 | -0.046 (-0.106, 0.015)  | 0.137   | 90                                | 12                 | -0.012 (-0.089, 0.065) | 0.765   |
| TNFRSF4                    | 131 | 27                 | -0.066 (-0.164, 0.032)  | 0.183   | 122                               | 28                 | -0.043 (-0.158, 0.072) | 0.457   |
| TNFSF13                    | 159 | 29                 | -0.066 (-0.17, 0.038)   | 0.213   | 144                               | 27                 | -0.052 (-0.185, 0.081) | 0.441   |
| FOLR1                      | 175 | -1                 | 0.14 (-0.11, 0.389)     | 0.271   | 159                               | -1                 | 0.244 (-0.062, 0.55)   | 0.117   |
| KLK11                      | 127 | 0                  | 0.091 (-0.119, 0.301)   | 0.391   | 117                               | 0                  | 0.153 (-0.097, 0.403)  | 0.229   |
| KLK13                      | 91  | -1                 | 0.081 (-0.123, 0.284)   | 0.434   | 86                                | 4                  | 0.255 (0.002, 0.508)   | 0.048   |
| SPARC                      | 145 | 18                 | -0.014 (-0.05, 0.022)   | 0.452   | 130                               | 17                 | -0.02 (-0.068, 0.029)  | 0.425   |
| ADAM8                      | 175 | 27                 | -0.041 (-0.148, 0.066)  | 0.453   | 159                               | 27                 | -0.028 (-0.156, 0.101) | 0.673   |
| ITGB5                      | 160 | 27                 | -0.018 (-0.066, 0.03)   | 0.467   | 144                               | 27                 | -0.015 (-0.073, 0.043) | 0.615   |
| TGFA                       | 158 | 20                 | -0.028 (-0.107, 0.05)   | 0.473   | 142                               | 22                 | -0.012 (-0.107, 0.083) | 0.807   |
| TGFR2                      | 105 | 14                 | -0.03 (-0.117, 0.056)   | 0.490   | 96                                | 15                 | -0.078 (-0.194, 0.038) | 0.186   |
| TNFRSF19                   | 173 | 29                 | -0.036 (-0.146, 0.074)  | 0.521   | 157                               | 31                 | -0.022 (-0.152, 0.108) | 0.740   |
| CEACAM5                    | 72  | 4                  | -0.054 (-0.235, 0.126)  | 0.552   | 67                                | 2                  | -0.031 (-0.232, 0.17)  | 0.757   |
| KLK8                       | 79  | 2                  | -0.046 (-0.215, 0.124)  | 0.592   | 75                                | 1                  | -0.006 (-0.205, 0.193) | 0.955   |
| ANXA1                      | 175 | 7                  | -0.048 (-0.227, 0.131)  | 0.594   | 159                               | 5                  | -0.037 (-0.256, 0.181) | 0.735   |
| WFDC2                      | 175 | 37                 | -0.006 (-0.027, 0.016)  | 0.605   | 159                               | 38                 | -0.015 (-0.042, 0.012) | 0.273   |
| IGF1R                      | 175 | 29                 | -0.021 (-0.104, 0.062)  | 0.620   | 159                               | 31                 | -0.013 (-0.113, 0.088) | 0.804   |
| EPHA2                      | 75  | -3                 | 0.021 (-0.073, 0.115)   | 0.653   | 70                                | -2                 | 0.054 (-0.061, 0.169)  | 0.354   |
| WISP1                      | 175 | 50                 | -0.018 (-0.101, 0.064)  | 0.659   | 159                               | 51                 | -0.021 (-0.123, 0.08)  | 0.678   |
| S100A11                    | 76  | 5                  | -0.033 (-0.201, 0.135)  | 0.696   | 73                                | 6                  | 0.001 (-0.191, 0.194)  | 0.990   |
| HGF                        | 175 | 33                 | -0.016 (-0.101, 0.07)   | 0.718   | 159                               | 34                 | -0.023 (-0.128, 0.083) | 0.669   |
| FGFBP1                     | 128 | 2                  | -0.025 (-0.165, 0.115)  | 0.724   | 120                               | 3                  | 0.016 (-0.146, 0.179)  | 0.842   |
| NECTIN4                    | 132 | -1                 | 0.034 (-0.16, 0.228)    | 0.730   | 121                               | -2                 | 0.086 (-0.159, 0.33)   | 0.490   |
| CRNN                       | 175 | 9                  | -0.041 (-0.275, 0.193)  | 0.731   | 159                               | 8                  | 0.035 (-0.25, 0.321)   | 0.806   |
| LY9                        | 151 | 14                 | -0.013 (-0.091, 0.065)  | 0.738   | 138                               | 16                 | 0.026 (-0.069, 0.122)  | 0.587   |
| FURIN                      | 136 | 1                  | -0.021 (-0.148, 0.105)  | 0.741   | 124                               | 0                  | 0.011 (-0.144, 0.165)  | 0.892   |
| PPY                        | 170 | 34                 | -0.018 (-0.132, 0.096)  | 0.755   | 154                               | 37                 | -0.079 (-0.211, 0.054) | 0.242   |
| SDC1                       | 175 | 37                 | -0.018 (-0.133, 0.097)  | 0.756   | 159                               | 37                 | -0.053 (-0.194, 0.087) | 0.455   |
| ERBB3                      | 175 | 37                 | -0.008 (-0.067, 0.051)  | 0.781   | 159                               | 37                 | 0 (-0.073, 0.072)      | 0.994   |
| CEACAM1                    | 173 | 14                 | -0.011 (-0.097, 0.074)  | 0.790   | 157                               | 13                 | 0.01 (-0.094, 0.113)   | 0.857   |
| CD27                       | 175 | 14                 | -0.018 (-0.16, 0.123)   | 0.799   | 159                               | 18                 | 0.029 (-0.134, 0.192)  | 0.728   |
| CD160                      | 171 | 10                 | -0.023 (-0.21, 0.163)   | 0.807   | 155                               | 9                  | -0.011 (-0.24, 0.218)  | 0.925   |
| EGF                        | 175 | 20                 | 0.011 (-0.099, 0.122)   | 0.838   | 159                               | 20                 | 0.017 (-0.12, 0.154)   | 0.808   |
| MSLN                       | 118 | 7                  | -0.009 (-0.11, 0.093)   | 0.868   | 108                               | 5                  | -0.011 (-0.153, 0.13)  | 0.873   |
| VEGFA                      | 167 | -2                 | 0.013 (-0.186, 0.212)   | 0.898   | 153                               | -3                 | 0.093 (-0.15, 0.335)   | 0.452   |
| ERBB4                      | 175 | 22                 | -0.002 (-0.102, 0.097)  | 0.963   | 159                               | 22                 | 0.02 (-0.103, 0.142)   | 0.753   |
| IFNGR1                     | 175 | 19                 | 0.001 (-0.098, 0.1)     | 0.981   | 159                               | 19                 | 0.037 (-0.084, 0.158)  | 0.547   |

Data presented as B coefficients and 95% confidence intervals (CI) for the association with B-As.

No proteins passed the Bonferroni adjustment for multiple comparison ( $p$ -value 0.05/45).

Analyses restricted to those proteins with > 40% observations above LOD.

<sup>a</sup> Multivariate linear regression models adjusted for age, U-osmolality, and U-leukocytes.

<sup>b</sup> Multivariate linear regression models adjusted for age, U-osmolality, U-leukocytes, and B-Li. The number of individuals differs from the main analysis because some individuals did not have B-Li data available.

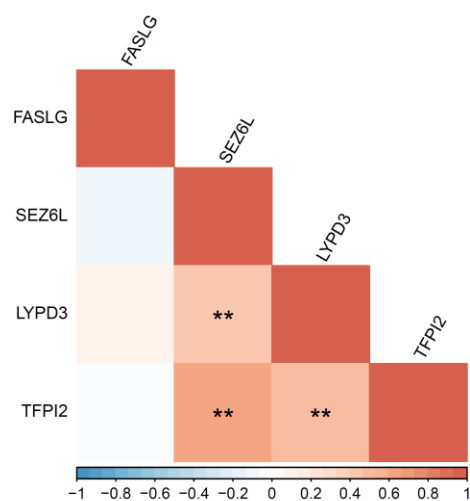

**Supplementary Figure 3.** Heat map of Spearman correlations between the top proteins associated with B-As ( $p$ -value  $< 0.05$ ). Two asterisks indicate  $p$ -values  $< 0.01$ .
